# Supplementary material
Source: MDPI journal article supplement (https://www.mdpi.com/2073-4395/14/2/287)
Supplement: s1 [file s1]

**Table S1:** Ion concentrations (g/kg) in stem, root, and leaf of mono *F. arundinacea*, *T. pratense*, and *M. sativa* and mixed cropping under various salinity and Mg, Ca sulfate treatments at 60DAT and 120DAT.

| Date          | Species               | Treatments                 | Na                     |                         |                         | Ca                       |                         |                          | K                      |                        |                         | Mg                      |                        |                         | P                                   |                                     |                         |
|---------------|-----------------------|----------------------------|------------------------|-------------------------|-------------------------|--------------------------|-------------------------|--------------------------|------------------------|------------------------|-------------------------|-------------------------|------------------------|-------------------------|-------------------------------------|-------------------------------------|-------------------------|
|               |                       |                            | Stem                   | Root                    | Leaf                    | Stem                     | Root                    | Leaf                     | Stem                   | Root                   | Leaf                    | Stem                    | Root                   | Leaf                    | Stem                                | Root                                | Leaf                    |
| 60<br>D<br>AT | <i>F. arundinacea</i> | Control                    | 0.80±0.06 <sup>b</sup> | 0.36±0.06 <sup>b</sup>  | 1.24±0.43 <sup>c</sup>  | 23.73±0.58 <sup>a</sup>  | 2.74±0.58 <sup>b</sup>  | 22.50±0.58 <sup>c</sup>  | 2.36±0.58 <sup>a</sup> | 1.08±0.53 <sup>a</sup> | 2.42±0.58 <sup>a</sup>  | 2.25±0.58 <sup>a</sup>  | 1.11±0.58 <sup>a</sup> | 4.70±0.58 <sup>a</sup>  | 6.78±0.58 <sup>b</sup> <sub>c</sub> | 4.29±0.58 <sup>b</sup> <sub>c</sub> | 6.08±0.58 <sup>b</sup>  |
|               |                       | 25 mM NaCl                 | 3.36±0.06 <sup>a</sup> | 0.76±0.06 <sup>b</sup>  | 2.72±0.06 <sup>bc</sup> | 24.28±0.58 <sup>a</sup>  | 2.98±0.58 <sup>b</sup>  | 24.47±0.58 <sup>b</sup>  | 3.02±0.6 <sup>a</sup>  | 1.21±0.53 <sup>a</sup> | 2.87±0.58 <sup>a</sup>  | 3.46±0.58 <sup>a</sup>  | 1.53±0.58 <sup>a</sup> | 4.54±0.58 <sup>a</sup>  | 8.98±0.58 <sup>a</sup>              | 2.94±0.58 <sup>c</sup>              | 6.04±0.58 <sup>b</sup>  |
|               |                       | 50 mM NaCl                 | 3.15±0.58 <sup>a</sup> | 2.77±0.58 <sup>a</sup>  | 4.08±0.58 <sup>b</sup>  | 21.11±0.58 <sup>b</sup>  | 5.95±0.58 <sup>a</sup>  | 27.87±0.58 <sup>a</sup>  | 2.63±0.58 <sup>a</sup> | 1.23±0.58 <sup>a</sup> | 2.61±0.58 <sup>a</sup>  | 2.63±0.58 <sup>a</sup>  | 1.91±0.58 <sup>a</sup> | 3.40±0.58 <sup>a</sup>  | 8.21±0.58 <sup>a</sup> <sub>b</sub> | 5.73±0.58 <sup>b</sup>              | 8.94±0.58 <sup>a</sup>  |
|               |                       | 100 mM NaCl                | 3.75±0.06 <sup>a</sup> | 2.54±0.58 <sup>a</sup>  | 6.00±0.06 <sup>a</sup>  | 23.33±0.58 <sup>a</sup>  | 4.12±0.58 <sup>b</sup>  | 25.75±0.58 <sup>b</sup>  | 2.82±0.58 <sup>a</sup> | 1.48±0.58 <sup>a</sup> | 2.86±0.58 <sup>a</sup>  | 2.62±0.58 <sup>a</sup>  | 1.40±0.58 <sup>a</sup> | 4.05±0.58 <sup>a</sup>  | 10.12±0.58 <sup>a</sup>             | 8.46±0.58 <sup>a</sup>              | 9.85±0.58 <sup>a</sup>  |
|               | <i>T. pratense</i>    | Control                    | 0.21±0.06 <sup>d</sup> | 2.99±0.58 <sup>c</sup>  | 0.19±0.06 <sup>c</sup>  | 26.25±0.58 <sup>c</sup>  | 13.24±0.58 <sup>a</sup> | 19.25±0.58 <sup>b</sup>  | 2.53±0.58 <sup>a</sup> | 2.39±0.53 <sup>a</sup> | 4.10±0.58 <sup>a</sup>  | 8.29±0.58 <sup>c</sup>  | 4.45±0.58 <sup>b</sup> | 15.62±0.58 <sup>c</sup> | 18.12±0.58 <sup>a</sup>             | 25.41±0.58 <sup>a</sup>             | 28.33±0.58 <sup>a</sup> |
|               |                       | 25 mM NaCl                 | 1.77±0.06 <sup>c</sup> | 4.19±0.58 <sup>bc</sup> | 0.51±0.06 <sup>bc</sup> | 29.65±0.58 <sup>b</sup>  | 13.49±0.58 <sup>a</sup> | 14.50±0.58 <sup>c</sup>  | 3.26±0.58 <sup>a</sup> | 1.91±0.58 <sup>a</sup> | 4.90±0.58 <sup>a</sup>  | 11.03±0.58 <sup>b</sup> | 3.68±0.58 <sup>b</sup> | 23.40±0.58 <sup>a</sup> | 5.85±0.58 <sup>b</sup>              | 7.34±0.58 <sup>c</sup>              | 5.10±0.58 <sup>a</sup>  |
|               |                       | 50 mM NaCl                 | 2.73±0.06 <sup>b</sup> | 5.68±0.58 <sup>b</sup>  | 1.23±0.58 <sup>ab</sup> | 34.95±0.58 <sup>a</sup>  | 12.65±0.58 <sup>a</sup> | 20.65±0.58 <sup>ab</sup> | 2.83±0.58 <sup>a</sup> | 1.98±0.58 <sup>a</sup> | 4.06±0.58 <sup>a</sup>  | 10.62±0.58 <sup>b</sup> | 2.67±0.58 <sup>b</sup> | 21.80±0.58 <sup>a</sup> | 6.69±0.58 <sup>b</sup>              | 6.01±0.58 <sup>c</sup>              | 6.69±0.58 <sup>a</sup>  |
|               |                       | 100 mM NaCl                | 3.87±0.06 <sup>a</sup> | 8.06±0.58 <sup>a</sup>  | 2.12±0.06 <sup>a</sup>  | 27.92±0.58 <sup>bc</sup> | 12.09±0.58 <sup>a</sup> | 22.42±0.57 <sup>a</sup>  | 4.36±0.58 <sup>a</sup> | 3.29±0.58 <sup>a</sup> | 4.61±0.58 <sup>a</sup>  | 17.76±0.58 <sup>a</sup> | 6.83±0.58 <sup>a</sup> | 18.20±0.58 <sup>b</sup> | 7.80±0.58 <sup>b</sup>              | 16.34±0.58 <sup>b</sup>             | 11.24±0.58 <sup>a</sup> |
|               | <i>M. sativa</i>      | Control                    | 0.41±0.06 <sup>a</sup> | 0.56±0.06 <sup>b</sup>  | 0.35±0.06 <sup>bc</sup> | 21.01±0.58 <sup>b</sup>  | 8.10±0.58 <sup>a</sup>  | 23.17±0.58 <sup>b</sup>  | 0.97±0.6 <sup>a</sup>  | 1.08±0.53 <sup>a</sup> | 4.71±0.58 <sup>a</sup>  | 7.79±0.58 <sup>ab</sup> | 2.63±0.58 <sup>a</sup> | 20.84±0.58 <sup>a</sup> | 18.10±0.58 <sup>a</sup>             | 23.09±0.58 <sup>a</sup>             | 18.10±0.58 <sup>a</sup> |
|               |                       | 25 mM NaCl                 | 1.03±0.55 <sup>a</sup> | 2.40±0.58 <sup>a</sup>  | 0.18±0.06 <sup>c</sup>  | 21.03±0.58 <sup>b</sup>  | 9.32±0.58 <sup>a</sup>  | 20.35±0.58 <sup>c</sup>  | 1.03±0.5 <sup>a</sup>  | 1.37±0.58 <sup>a</sup> | 2.35±0.58 <sup>b</sup>  | 8.88±0.58 <sup>a</sup>  | 2.67±0.58 <sup>a</sup> | 16.04±0.58 <sup>c</sup> | 5.09±0.58 <sup>c</sup>              | 6.68±0.58 <sup>d</sup>              | 7.21±0.58 <sup>c</sup>  |
|               |                       | 50 mM NaCl                 | 0.64±0.06 <sup>a</sup> | 1.60±0.58 <sup>ab</sup> | 0.38±0.06 <sup>ab</sup> | 26.31±0.58 <sup>a</sup>  | 9.83±0.58 <sup>a</sup>  | 29.94±0.58 <sup>a</sup>  | 1.53±0.58 <sup>a</sup> | 1.11±0.58 <sup>a</sup> | 3.12±0.58 <sup>ab</sup> | 6.72±0.58 <sup>b</sup>  | 2.78±0.58 <sup>a</sup> | 14.34±0.58 <sup>c</sup> | 10.11±0.58 <sup>b</sup>             | 9.13±0.58 <sup>c</sup>              | 13.11±0.58 <sup>b</sup> |
|               |                       | 100 mM NaCl                | 1.12±0.50 <sup>a</sup> | 2.74±0.58 <sup>a</sup>  | 0.55±0.06 <sup>a</sup>  | 24.58±0.58 <sup>a</sup>  | 8.55±0.58 <sup>a</sup>  | 22.61±0.58 <sup>b</sup>  | 1.77±0.58 <sup>a</sup> | 1.03±0.54 <sup>a</sup> | 4.31±0.58 <sup>ab</sup> | 9.65±0.58 <sup>a</sup>  | 1.77±0.58 <sup>a</sup> | 17.95±0.58 <sup>b</sup> | 9.32±0.58 <sup>b</sup>              | 12.05±0.58 <sup>b</sup>             | 13.65±0.58 <sup>b</sup> |
|               | Mixed cropping        | Control                    | 0.40±0.01 <sup>a</sup> | 1.34±0.03 <sup>a</sup>  | 0.64±0.04 <sup>a</sup>  | 19.22±0.03 <sup>a</sup>  | 7.68±0.58 <sup>a</sup>  | 18.58±0.58 <sup>a</sup>  | 3.05±0.58 <sup>a</sup> | 1.98±0.54 <sup>a</sup> | 3.98±0.01               | 7.01±0.58 <sup>a</sup>  | 2.65±0.58 <sup>a</sup> | 12.68±0.58 <sup>a</sup> | 5.64±0.58 <sup>a</sup>              | 11.45±0.58 <sup>a</sup>             | 10.18±0.58 <sup>a</sup> |
|               |                       | 100 mM NaCl                | 2.79±0.01 <sup>b</sup> | 1.69±0.01 <sup>a</sup>  | 3.46±0.06 <sup>a</sup>  | 23.85±0.58 <sup>a</sup>  | 3.40±0.58 <sup>ab</sup> | 17.29±0.58 <sup>c</sup>  | 2.91±0.58 <sup>a</sup> | 1.18±0.58 <sup>a</sup> | 3.85±0.01 <sup>a</sup>  | 8.27±0.58 <sup>a</sup>  | 1.36±0.58 <sup>b</sup> | 11.67±0.58 <sup>a</sup> | 3.51±0.58 <sup>c</sup>              | 4.64±0.58 <sup>a</sup>              | 14.33±0.58 <sup>a</sup> |
|               |                       | 10CaSO <sub>4</sub> + NaCl | 4.58±0.58 <sup>a</sup> | 1.95±0.58 <sup>a</sup>  | 4.02±0.58 <sup>a</sup>  | 24.25±0.58 <sup>a</sup>  | 4.39±0.58 <sup>a</sup>  | 25.59±0.58 <sup>b</sup>  | 2.37±0.58 <sup>a</sup> | 2.19±0.58 <sup>a</sup> | 2.39±0.58 <sup>a</sup>  | 8.51±0.58 <sup>a</sup>  | 3.51±0.58 <sup>a</sup> | 5.20±0.58 <sup>b</sup>  | 16.85±0.58 <sup>a</sup>             | 5.63±0.58 <sup>a</sup>              | 13.81±0.58 <sup>a</sup> |
|               |                       | 2MgSO <sub>4</sub> + NaCl  | 4.86±0.58 <sup>a</sup> | 1.16±0.58 <sup>a</sup>  | 4.70±0.58 <sup>a</sup>  | 21.54±0.58 <sup>b</sup>  | 2.08±0.58 <sup>b</sup>  | 28.40±0.58 <sup>a</sup>  | 2.24±0.58 <sup>a</sup> | 0.96±0.06 <sup>a</sup> | 2.29±0.58 <sup>a</sup>  | 3.94±0.58 <sup>b</sup>  | 1.16±0.58 <sup>b</sup> | 4.35±0.58 <sup>b</sup>  | 11.38±0.58 <sup>b</sup>             | 2.06±0.58 <sup>b</sup>              | 8.46±0.58 <sup>b</sup>  |

|                         |                       |                            |                             |                             |                             |                             |                             |                              |                              |                             |                             |                            |                            |                            |                                |                                |                                |
|-------------------------|-----------------------|----------------------------|-----------------------------|-----------------------------|-----------------------------|-----------------------------|-----------------------------|------------------------------|------------------------------|-----------------------------|-----------------------------|----------------------------|----------------------------|----------------------------|--------------------------------|--------------------------------|--------------------------------|
| <b>120<br/>D<br/>AT</b> | <i>F. arundinacea</i> | Control                    | 2.63±00<br>6 <sup>c</sup>   | 0.73±0.<br>04 <sup>d</sup>  | 1.74±0.<br>47 <sup>c</sup>  | 3.67±0.3<br>5 <sup>a</sup>  | 2.43±0.<br>41 <sup>a</sup>  | 5.42±0.5<br>8 <sup>a</sup>   | 29.53±0.<br>61 <sup>a</sup>  | 3.00±0.<br>58 <sup>b</sup>  | 24.32±0<br>.58 <sup>b</sup> | 4.35±0.<br>58 <sup>a</sup> | 1.49±0.<br>42 <sup>a</sup> | 4.03±0.<br>61 <sup>a</sup> | 1131.7±60<br>.63 <sup>a</sup>  | 233.77±52<br>.86 <sup>a</sup>  | 410.10±57<br>.79 <sup>a</sup>  |
|                         |                       | 25 mM NaCl                 | 6.96±00<br>3 <sup>a</sup>   | 3.72±0.<br>06 <sup>b</sup>  | 4.13±0.<br>58 <sup>b</sup>  | 3.63±0.3<br>8 <sup>a</sup>  | 2.85±0.<br>60 <sup>a</sup>  | 5.40±0.5<br>8 <sup>a</sup>   | 24.11±0.<br>58 <sup>b</sup>  | 5.11±0.<br>58 <sup>a</sup>  | 27.30±0<br>.58 <sup>a</sup> | 4.45±0.<br>55 <sup>a</sup> | 1.71±0.<br>47 <sup>a</sup> | 4.54±0.<br>62 <sup>a</sup> | 303.77±56<br>.87 <sup>b</sup>  | 258.83±54<br>.84 <sup>a</sup>  | 476.97±57<br>.46 <sup>a</sup>  |
|                         |                       | 50 mM NaCl                 | 7.01±00<br>3 <sup>a</sup>   | 3.16±0.<br>07 <sup>c</sup>  | 4.46±0.<br>09 <sup>b</sup>  | 3.63±0.2<br>6 <sup>a</sup>  | 2.56±0.<br>50 <sup>a</sup>  | 6.11±0.5<br>8 <sup>a</sup>   | 28.39±0.<br>52 <sup>a</sup>  | 2.48±0.<br>55 <sup>b</sup>  | 20.28±0<br>.55 <sup>c</sup> | 3.81±0.<br>58 <sup>a</sup> | 1.52±0.<br>36 <sup>a</sup> | 3.62±0.<br>57 <sup>a</sup> | 455.52±52<br>.51 <sup>b</sup>  | 102.74±4.<br>72 <sup>a</sup>   | 362.53±57<br>.74 <sup>a</sup>  |
|                         |                       | 100 mM NaCl                | 4.00±00<br>6 <sup>b</sup>   | 6.98±0.<br>29 <sup>a</sup>  | 12.19±0<br>.53 <sup>a</sup> | 3.52±0.2<br>9 <sup>a</sup>  | 2.12±0.<br>49 <sup>a</sup>  | 4.70±0.4<br>7 <sup>a</sup>   | 27.80±0.<br>55 <sup>a</sup>  | 5.29±0.<br>58 <sup>a</sup>  | 24.23±0<br>.58 <sup>b</sup> | 3.55±0.<br>55 <sup>a</sup> | 1.07±0.<br>43 <sup>a</sup> | 3.80±0.<br>61 <sup>a</sup> | 473.71±59<br>.46 <sup>b</sup>  | 655.94±52<br>.26 <sup>a</sup>  | 545.44±52<br>.28 <sup>a</sup>  |
|                         | <i>T. pratense</i>    | Control                    | 0.59±00<br>6 <sup>d</sup>   | 3.58±0.<br>06 <sup>b</sup>  | 0.48±0.<br>06 <sup>c</sup>  | 12.30±0.<br>65 <sup>b</sup> | 3.54±0.<br>35 <sup>a</sup>  | 24.23±0.<br>58 <sup>b</sup>  | 17.27±0.<br>61 <sup>c</sup>  | 12.53±0<br>.61 <sup>a</sup> | 14.62±0<br>.58 <sup>c</sup> | 3.60±0.<br>58 <sup>a</sup> | 1.64±0.<br>40 <sup>a</sup> | 5.38±0.<br>52 <sup>a</sup> | 489.93±57<br>.91 <sup>a</sup>  | 1703.7±57<br>.46 <sup>a</sup>  | 684.61±57<br>.71 <sup>a</sup>  |
|                         |                       | 25 mM NaCl                 | 3.35±00<br>3 <sup>c</sup>   | 12.44±0<br>.30 <sup>c</sup> | 3.11±0.<br>49 <sup>b</sup>  | 15.53±0.<br>29 <sup>a</sup> | 4.04±0.<br>58 <sup>a</sup>  | 27.21±0.<br>58 <sup>a</sup>  | 28.65±0.<br>61 <sup>a</sup>  | 6.48±0.<br>55 <sup>b</sup>  | 21.53±0<br>.61 <sup>b</sup> | 3.63±0.<br>58 <sup>a</sup> | 1.68±0.<br>44 <sup>a</sup> | 5.28±0.<br>55 <sup>a</sup> | 390.82±55<br>.22 <sup>a</sup>  | 370.68±55<br>.22 <sup>c</sup>  | 331.67±53<br>.30 <sup>b</sup>  |
|                         |                       | 50 mM NaCl                 | 6.80±00<br>6 <sup>b</sup>   | 15.36±0<br>.41 <sup>b</sup> | 2.25±0.<br>03 <sup>b</sup>  | 15.51±0.<br>29 <sup>a</sup> | 4.56±0.<br>64 <sup>a</sup>  | 20.66±0.<br>52 <sup>c</sup>  | 27.52±0.<br>58 <sup>a</sup>  | 7.38±0.<br>55 <sup>b</sup>  | 21.09±0<br>.55 <sup>b</sup> | 3.54±0.<br>55 <sup>a</sup> | 1.64±0.<br>53 <sup>a</sup> | 4.69±0.<br>58 <sup>a</sup> | 356.88±54<br>.81 <sup>a</sup>  | 272.95±56<br>.30 <sup>c</sup>  | 521.9±57.<br>13 <sup>ab</sup>  |
|                         |                       | 100 mM NaCl                | 11.63±0<br>06 <sup>a</sup>  | 16.77±0<br>.43 <sup>a</sup> | 4.89±0.<br>40 <sup>a</sup>  | 11.05±0.<br>55 <sup>b</sup> | 3.27±0.<br>58 <sup>a</sup>  | 22.64±0.<br>58 <sup>b</sup>  | 23.29±0.<br>70 <sup>b</sup>  | 6.54±0.<br>58 <sup>b</sup>  | 27.33±0<br>.58 <sup>a</sup> | 2.55±0.<br>55 <sup>a</sup> | 1.44±0.<br>49 <sup>a</sup> | 4.53±0.<br>51 <sup>a</sup> | 376.14±54<br>.75               | 555.59±54<br>.79 <sup>b</sup>  | 469.65±59<br>.10 <sup>b</sup>  |
|                         | <i>M. sativa</i>      | Control                    | 0.76±00<br>9 <sup>c</sup>   | 0.82±0.<br>06 <sup>d</sup>  | 0.58±0.<br>06 <sup>b</sup>  | 8.69±0.5<br>7 <sup>a</sup>  | 2.39±0.<br>46 <sup>a</sup>  | 25.12±0.<br>58 <sup>a</sup>  | 24.60±0.<br>76 <sup>bc</sup> | 10.45±0<br>.58 <sup>a</sup> | 30.59±0<br>.58 <sup>b</sup> | 1.68±0.<br>44 <sup>a</sup> | 1.51±0.<br>49 <sup>a</sup> | 4.86±0.<br>56 <sup>a</sup> | 353.35±51<br>.76 <sup>d</sup>  | 704.15±55<br>.18 <sup>c</sup>  | 366.12±57<br>.71 <sup>c</sup>  |
|                         |                       | 25 mM NaCl                 | 5.06±00<br>3 <sup>b</sup>   | 8.65±0.<br>45 <sup>b</sup>  | 3.03±0.<br>58 <sup>a</sup>  | 9.85±0.6<br>0 <sup>a</sup>  | 2.72±0.<br>58 <sup>a</sup>  | 21.79±0.<br>69 <sup>bc</sup> | 26.51±0.<br>58 <sup>b</sup>  | 6.26±0.<br>55 <sup>b</sup>  | 29.12±0<br>.55 <sup>b</sup> | 1.97±0.<br>52 <sup>a</sup> | 1.91±0.<br>49 <sup>a</sup> | 3.91±0.<br>59 <sup>a</sup> | 774.22±57<br>.74 <sup>c</sup>  | 548.65±46<br>.27 <sup>d</sup>  | 645.53±56<br>.84 <sup>b</sup>  |
|                         |                       | 50 mM NaCl                 | 7.79±00<br>6 <sup>a</sup>   | 10.46±0<br>.29 <sup>a</sup> | 3.50±0.<br>29 <sup>a</sup>  | 10.21±0.<br>49 <sup>a</sup> | 3.30±0.<br>58 <sup>a</sup>  | 23.64±0.<br>58 <sup>ab</sup> | 24±0.58 <sup>c</sup>         | 9.20±0.<br>58 <sup>a</sup>  | 33.83±0<br>.61 <sup>a</sup> | 1.75±0.<br>47 <sup>a</sup> | 2.06±0.<br>61 <sup>a</sup> | 4.59±0.<br>58 <sup>a</sup> | 1348.23±6<br>0.91 <sup>a</sup> | 913.69±29<br>.82 <sup>b</sup>  | 572.45±52<br>.26 <sup>b</sup>  |
|                         |                       | 100 mM NaCl                | 5.00±00<br>6 <sup>b</sup>   | 6.02±0.<br>58 <sup>c</sup>  | 4.02±0.<br>58 <sup>a</sup>  | 9.06±0.6<br>1 <sup>a</sup>  | 2.71±0.<br>55 <sup>a</sup>  | 20.71±0.<br>61 <sup>c</sup>  | 28.57±0.<br>58 <sup>a</sup>  | 6.72±0.<br>58 <sup>b</sup>  | 20.47±0<br>.55 <sup>c</sup> | 1.73±0.<br>47 <sup>a</sup> | 1.46±0.<br>48 <sup>a</sup> | 4.52±0.<br>55 <sup>a</sup> | 1041.31±4<br>9.46 <sup>b</sup> | 1427.66±5<br>2.84 <sup>a</sup> | 1146.41±6<br>3.54 <sup>a</sup> |
|                         | Mixed cropping        | Mixed Control              | 1.51±04<br>8 <sup>a</sup>   | 1.84±0.<br>56 <sup>a</sup>  | 1.05±0.<br>55 <sup>a</sup>  | 7.13±0.5<br>8 <sup>a</sup>  | 3.13±0.<br>57               | 8.90±0.5<br>8 <sup>a</sup>   | 26.50±0.<br>58 <sup>a</sup>  | 6.60±0.<br>67 <sup>a</sup>  | 19.60±0<br>.58              | 4.02±0.<br>58 <sup>a</sup> | 1.06±0.<br>55 <sup>a</sup> | 3.46±0.<br>54 <sup>a</sup> | 378.75±5.<br>06                | 178.76±5.<br>83 <sup>a</sup>   | 488.01±5.<br>77 <sup>a</sup>   |
|                         |                       | Mixed 100 NaCl             | 3.24±0.<br>55 <sup>c</sup>  | 6.70±0.<br>60 <sup>ab</sup> | 0.57±0.<br>37 <sup>c</sup>  | 8.20±0.5<br>8 <sup>a</sup>  | 4.72±0.<br>57 <sup>b</sup>  | 0.72±0.4<br>1 <sup>c</sup>   | 23.71±0.<br>58 <sup>c</sup>  | 3.80±0.<br>62 <sup>ab</sup> | 0.16±0.<br>03 <sup>c</sup>  | 4.26±0.<br>55 <sup>a</sup> | 2.01±0.<br>58 <sup>a</sup> | 0.40±0.<br>35 <sup>b</sup> | 327.86±5.<br>78 <sup>b</sup>   | 153.13±5.<br>86 <sup>a</sup>   | 19.63±0.6<br>4 <sup>b</sup>    |
|                         |                       | 10CaSO <sub>4</sub> + NaCl | 11.70±0<br>.06 <sup>a</sup> | 5.32±0.<br>44 <sup>b</sup>  | 8.30±0.<br>58 <sup>b</sup>  | 5.41±0.4<br>7 <sup>b</sup>  | 26.57±0<br>.85 <sup>a</sup> | 3.63±0.4<br>4 <sup>b</sup>   | 27.02±0.<br>58 <sup>b</sup>  | 2.60±0.<br>52 <sup>b</sup>  | 2.52±0.<br>55 <sup>b</sup>  | 2.73±0.<br>56 <sup>a</sup> | 2.65±0.<br>59 <sup>a</sup> | 2.52±0.<br>52 <sup>a</sup> | 561.89±50<br>.20 <sup>a</sup>  | 255.95±51<br>.99 <sup>a</sup>  | 434.69±55<br>.31 <sup>a</sup>  |
|                         |                       | 2MgSO <sub>4</sub> + NaCl  | 6.64±0.<br>03 <sup>b</sup>  | 7.49±0.<br>58 <sup>a</sup>  | 10.60±0<br>.30 <sup>a</sup> | 4.38±0.5<br>2 <sup>b</sup>  | 2.69±0.<br>32 <sup>b</sup>  | 6.21±0.5<br>8 <sup>a</sup>   | 30.09±0.<br>55 <sup>a</sup>  | 4.79±0.<br>61 <sup>a</sup>  | 27.44±0<br>.64 <sup>a</sup> | 2.72±0.<br>58 <sup>a</sup> | 1.60±0.<br>42 <sup>a</sup> | 3.58±0.<br>54 <sup>a</sup> | 627.70±54<br>.03 <sup>a</sup>  | 228.27±52<br>.77 <sup>a</sup>  | 461.48±60<br>.05 <sup>a</sup>  |

Different letters within a cultivar indicate significant differences between groups (p < 0.05).
